# Supplementary material for: Comparative study of antibacterial properties of polystyrene films with TiOx and Cu nanoparticles fabricated using cluster beam technique
Source: publisher site journal article supplement (doi:10.3762/bjnano.9.80), 2018-03-12
Supplement: Additional file 1 [file 2190-4286-9-80-S1.pdf]

## **Supporting Information**

for

### **Comparative study of antibacterial properties of polystyrene films with TiO<sub>x</sub> and Cu nanoparticles fabricated using cluster beam technique**

Vladimir N. Popok<sup>\*1</sup>, Cesarino M. Jeppesen<sup>1</sup>, Peter Fojan<sup>1</sup>, Anna Kuzminova<sup>2</sup>, Jan Hanuš<sup>2</sup> and Ondřej Kylián<sup>2</sup>

Address: <sup>1</sup> Department of Materials and Production, Aalborg University, Skjernvej 4A, 9220 Aalborg, Denmark and <sup>2</sup> Department of Macromolecular Physics, Charles University, V Holešovičkách 2, 18000 Prague 8, Czech Republic

Email: Vladimir N. Popok - vp@mp.aau.dk

\* Corresponding author

### **Optical extinction spectra of samples with TiO<sub>x</sub> NP**

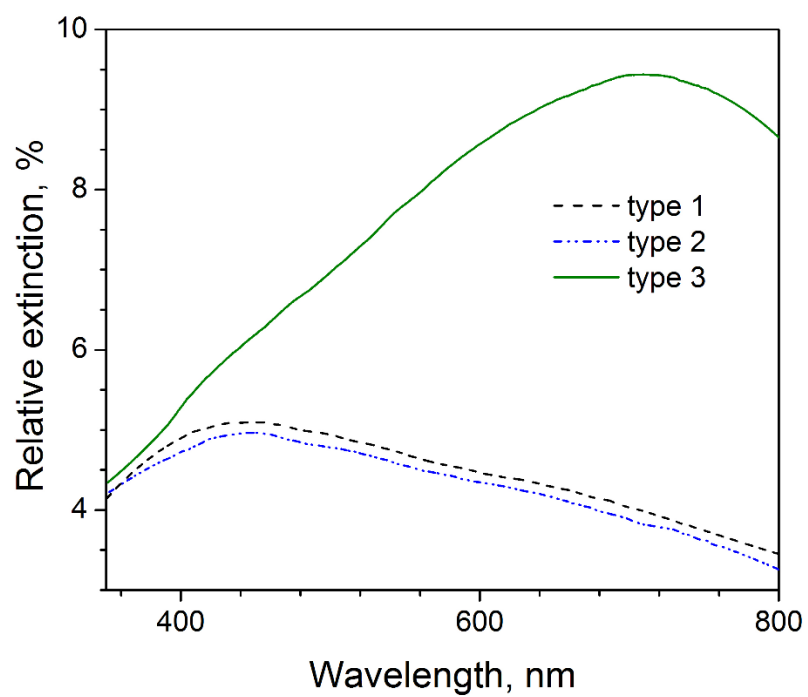

**Figure S1:** Extinction spectra of samples with deposited  $\text{TiO}_x$  NPs of types 1, 2 and 3. Samples of type 1 and 2 show almost identical spectra, while for type 3 the extinction is quite different.
